# Supplementary material for: Circulating levels of IL-1 family cytokines and receptors in Alzheimer’s disease: new markers of disease progression?
Source: Springer Nature journal article supplement (doi:10.1186/s12974-018-1376-1), 2018-12-01
Supplement: MOESM1 [file 16336906]

**Additional file 1.** Results of multiple linear regression models without control for confounding variables

|               | NHS vs. SMC                                  | NHS vs. MCI                                   | NHS vs. AD                                   | AD vs. SMC                                    | AD vs. MCI                                    | MCI vs. SMC                                    |
|---------------|----------------------------------------------|-----------------------------------------------|----------------------------------------------|-----------------------------------------------|-----------------------------------------------|------------------------------------------------|
| IL-1 $\alpha$ | 0.1 (-0.40 to 0.42)<br><i>p</i> =0.96        | -0.13 (-0.56 to 0.3)<br><i>p</i> =0.54        | 3.29 (-0.29 to 6.61)<br><i>p</i> =0.052      | 3.28 (-0.84 to 7.41)<br><i>p</i> =0.12        | 3.42 (-1.38 to 8.23)<br><i>p</i> =0.16        | -0.14 (-0.53 to 0.24)<br><i>p</i> =0.46        |
| IL-1 $\beta$  | -0.35 (-1.2 to 0.54)<br><i>p</i> =0.44       | -0.28 (-1.29 to 0.72)<br><i>p</i> =0.57       | 2.6 (-0.21 to 5.51)<br><i>p</i> =0.07        | 3.0 (-0.43 to 6.43)<br><i>p</i> =0.86         | 2.9 (-1.06 to 6.93)<br><i>p</i> =0.14         | 0.06 (-0.49 to 0.62)<br><i>p</i> =0.81         |
| IL-1Ra        | -23.1 (-47.5 to 1.2)<br><i>p</i> =0.06       | 14.8 (-13.1 to 42.9)<br><i>p</i> =0.29        | 58.1 (3.8 to 112.4)<br><i>p</i> =0.036       | 81.3 (16.5 to 146.1)<br><i>p</i> =0.014       | 43.2 (-32.1 to 118.6)<br><i>p</i> =0.26       | 38.0 (11.2 to 64.8)<br><i>p</i> =0.006         |
| IL-18         | -46.6 (-74.5 to -18.6)<br><i>p</i> =0.001    | 19.1 (-19.3 to 57.6)<br><i>p</i> =0.32        | 64.2 (-6.1 to 134.6)<br><i>p</i> =0.073      | 110.8 (26.8 to 194.8)<br><i>p</i> =0.010      | 45.02 (-56.3 to 146.7)<br><i>p</i> =0.38      | 65.8 (27.6 to 103.9)<br><i>p</i> =0.001        |
| IL-33         | -0.45 (-1.05 to 0.15)<br><i>p</i> =0.14      | -0.25 (-0.93 to 0.43)<br><i>p</i> =0.46       | 2.6 (0.29 to 5.0)<br><i>p</i> =0.028         | 3.1 (0.23 to 5.9)<br><i>p</i> =0.034          | 2.9 (-0.43 to 6.2)<br><i>p</i> =0.088         | 0.19 (-0.19 to 0.58)<br><i>p</i> =0.31         |
| sIL-1R1       | -218.9 (-291.5 to -146.2)<br><i>p</i> <0.001 | -56.6 (-161.06 to 47.7)<br><i>p</i> =0.28     | 407.8 (312.9 to 502.86)<br><i>p</i> <0.001   | 626.8 (519.5 to 734.04)<br><i>p</i> <0.001    | 464.52 (317.6 to 611.3)<br><i>p</i> <0.001    | 162.2 (45.74 to 278.8)<br><i>p</i> =0.007      |
| sIL-1R2       | -961.1 (-1516.8 to -405)<br><i>p</i> =0.001  | 3570.6 (2777.3 to 4363.8)<br><i>p</i> <0.001  | -112.0 (-743.8 to 519.6)<br><i>p</i> <0.726  | 849.0 (306.7 to 1391.2)<br><i>p</i> =0.002    | -3682.6 (-4538.2 to -2827)<br><i>p</i> <0.001 | 4531.7 (3795.0 to 5268.3)<br><i>p</i> <0.001   |
| sIL-1R3       | 1273.1 (570.6 to 1975.6)<br><i>p</i> <0.001  | -178.7 (-936.0 to 578.6)<br><i>p</i> <0.64    | 2762.5 (2042.4 to 3482.7)<br><i>p</i> <0.001 | 1489.4 (688.8 to 2290.0)<br><i>p</i> <0.001   | 2941.2 (2093.1 to 3789.3)<br><i>p</i> <0.001  | -1451.8 (-2271.4 to -631.9)<br><i>p</i> =0.001 |
| sIL-1R4       | -648.3 (-1550.9 to 254.2)<br><i>p</i> =0.158 | -471.9 (-1501.8 to 557.9)<br><i>p</i> =0.336  | 5623.9 (4081.6 to 7166.3)<br><i>p</i> <0.001 | 6272.3 (4396.3 to 8148.3)<br><i>p</i> <0.001  | 6095.8 (3922.5 to 8269.1)<br><i>p</i> <0.001  | 176.4 (-1013.2 to 1366.1)<br><i>p</i> =0.76    |
| IL-18BP       | -4659 (-5579 to -3539.6)<br><i>p</i> <0.001  | -4722.2 (-6011 to -3342.9)<br><i>p</i> <0.001 | 8092.7 (6254 to 9931)<br><i>p</i> <0.001     | 12752.3 (10748.5 to 14756)<br><i>p</i> <0.001 | 12815 (10490.1 to 15139)<br><i>p</i> <0.001   | -62.6 (-1027.6 to 902.2)<br><i>p</i> =0.89     |
| free IL-18    | 13.18 (-1.55 to 27.92)<br><i>p</i> =0.79     | 50.51 (32.43 to 68.6)<br><i>p</i> <0.001      | -15.60 (-43.27 to 11.98)<br><i>p</i> =0.26   | -28.8 (-62.2 to 4.57)<br><i>p</i> =0.09       | -66.16 (-105.8 to -26.5)<br><i>p</i> =0.001   | 37.33 (16.93 to 57.7)<br><i>p</i> <0.001       |

Values are  $\beta$  coefficients (95% confidence intervals) and *p* values.

AD, Alzheimer's disease; MCI, mild cognitive impairment; NHS, normal healthy subjects; SMC, subjective memory complaint.
