# Supplementary material for: Circulating levels of IL-1 family cytokines and receptors in Alzheimer’s disease: new markers of disease progression?
Source: Springer Nature journal article supplement (doi:10.1186/s12974-018-1376-1), 2018-12-01
Supplement: MOESM2 [file 16336906]

**Additional file 2.** Results of multiple linear regression models with control for confounding variables

|               | NHS vs. SMC                                   | NHS vs. MCI                                   | NHS vs. AD                                    | AD vs. SMC                                   | AD vs. MCI                                    | MCI vs. SMC                                  |
|---------------|-----------------------------------------------|-----------------------------------------------|-----------------------------------------------|----------------------------------------------|-----------------------------------------------|----------------------------------------------|
| IL-1 $\alpha$ | 0.19 (-0.25 to 0.63)<br><i>p</i> =0.39        | -0.21 (-0.68 to 0.24)<br><i>p</i> =0.35       | 9.17 (1.62 to 16.7)<br><i>p</i> =0.018        | 7.9 (-1.81 to 17.6)<br><i>p</i> =0.11        | 9.97 (-0.69 to 20.6)<br><i>p</i> =0.06        | -0.13 (-0.61 to 0.34)<br><i>p</i> =0.58      |
| IL-1 $\beta$  | -0.15 (-1.1 to 0.8)<br><i>p</i> =0.75         | -0.4 (-1.58 to 0.59)<br><i>p</i> =0.37        | 7.9 (1.63 to 14.3)<br><i>p</i> =0.014         | 8.1 (0.16 to 16.1)<br><i>p</i> =0.046        | 11.1 (2.51 to 19.7)<br><i>p</i> =0.012        | 0.23 (-0.34 to 0.8)<br><i>p</i> =0.42        |
| IL-1Ra        | -25.9 (-52.5 to 0.6)<br><i>p</i> =0.056       | -3.7 (-33.9 to 26.5)<br><i>p</i> =0.8         | 116.9 (0.34 to 237.3)<br><i>p</i> =0.049      | 98.3 (-51.8 to 248.5)<br><i>p</i> =0.19      | 125.3 (-42.2 to 293.3)<br><i>p</i> =0.14      | 40.9 (7.6 to 74.2)<br><i>p</i> =0.016        |
| IL-18         | -39.4 (-69.4 to -9.3)<br><i>p</i> =0.01       | 16.7 (-22.2 to 55.7)<br><i>p</i> =0.39        | -48.6 (-206.8 to 109.5)<br><i>p</i> =0.54     | -16.1 (-210.2 to 178.1)<br><i>p</i> =0.87    | -40.6 (-259.9 to 178.7)<br><i>p</i> =0.71     | 52.8 (8.8 to 96.8)<br><i>p</i> =0.019        |
| IL-33         | -0.39 (-1.09 to 0.29)<br><i>p</i> =0.26       | -0.60 (-1.38 to 0.17)<br><i>p</i> =0.12       | 7.5 (2.2 to 12.9)<br><i>p</i> =0.006          | 6.9 (0.21 to 13.6)<br><i>p</i> =0.043        | 9.1 (1.8 to 16.4)<br><i>p</i> =0.014          | 0.25 (-0.22 to 0.741)<br><i>p</i> =0.29      |
| sIL-1R1       | -193.4 (-266.5 to -120.4)<br><i>p</i> <0.001  | -58.2 (-155.2 to 38.82)<br><i>p</i> =0.23     | 268.9 (68.41 to -469.58)<br><i>p</i> =0.009   | 471.2 (242.1 to 700.3)<br><i>p</i> <0.001    | 327.2 (31.57 to 622.9)<br><i>p</i> =0.03      | 81.65 (-36.6 to 199.9)<br><i>p</i> =0.173    |
| sIL-1R2       | -812.8 (-1383.2 to -242.4)<br><i>p</i> =0.006 | 3402.4 (2567.4 to 4237.4)<br><i>p</i> <0.001  | -1337.8 (-2733.4 to 57.8)<br><i>p</i> =0.06   | 212.5 (-1061.0 to 1486.1)<br><i>p</i> =0.74  | -4148.5 (-6065.7 to -2231)<br><i>p</i> <0.001 | 4098.8 (3154.7 to 5042.9)<br><i>p</i> <0.001 |
| sIL-1R3       | 1526.13 (759.1 to 2293.0)<br><i>p</i> <0.001  | -255.9 (-1122.8 to 610.9)<br><i>p</i> =0.56   | 1765.6 (180.85 to 3350.5)<br><i>p</i> =0.029  | 607.3 (-1258.0 to 2472.6)<br><i>p</i> =0.52  | 2306.2 (435.3 to 4177.3)<br><i>p</i> =0.016   | -947.8 (-1932.6 to 36.8)<br><i>p</i> =0.059  |
| sIL-1R4       | -53.0 (-946.5 to 840.4)<br><i>p</i> =0.9      | -594.0 (-1627.4 to 439.4)<br><i>p</i> =0.25   | 3761.7 (422.1 to 7101.4)<br><i>p</i> =0.028   | 4780.1 (658.9 to 8901.3)<br><i>p</i> =0.023  | 5005.9 (379.3 to 9632.6)<br><i>p</i> =0.034   | 114.2 (-1276.0 to 1504.5)<br><i>p</i> =0.87  |
| IL-18BP       | -3848.2 (-4831.3 to -2865)<br><i>p</i> <0.001 | -4742.6 (-5906 to -3759.4)<br><i>p</i> <0.001 | 6792.1 (2938.5 to 10645.5)<br><i>p</i> =0.001 | 12377.6 (7917.1 to 16838)<br><i>p</i> <0.001 | 13298.1 (8389.8 to 18206)<br><i>p</i> <0.001  | 109.79 (-828.7 to 1048.3)<br><i>p</i> =0.81  |
| free IL-18    | 10.99 (-4.79 to 26.79)<br><i>p</i> =0.17      | 48.98 (29.74 to 68.2)<br><i>p</i> <0.001      | -47.0 (-110.64 to 16.45)<br><i>p</i> =0.14    | -69.5 (-148.0 to 9.03)<br><i>p</i> =0.082    | -88.73 (-177.0 to -0.39)<br><i>p</i> =0.049   | 33.0 (7.49 to 58.56)<br><i>p</i> =0.012      |

Values are  $\beta$  coefficients (95% confidence intervals) and *p* values.

AD, Alzheimer's disease; MCI, mild cognitive impairment; NHS, normal healthy subjects; SMC, subjective memory complaint.
